# Supplementary material for: Formulation and Characterization of Epalrestat-Loaded Polysorbate 60 Cationic Niosomes for Ocular Delivery
Source: MDPI journal article supplement (doi:10.3390/pharmaceutics15041247), 2023-04-14
Supplement: s1 [file s1]

## Supplementary Material

### HPLC method validation.

The niosomes were tested in duplicate and each release experiment data set was analyzed in separate. The validation of the HPLC method involved detection and quantitation limits, linearity, accuracy, and precision.

The limit of detection (LOD) and limit of quantitation (LOQ) are defined by[79]:

$$LOD = X_{b1} + 3S_{b1} \quad (3)$$

$$LOQ = X_{b1} + 10S_{b1} \quad (4)$$

The LOD and LOQ were found to be at 0.00813  $\mu\text{g/mL}$  and 0.01896  $\mu\text{g/mL}$ , respectively.

**Error! Reference source not found.** shows the validation of the HPLC quantification. The validation method has been carried out at multiple points in time.

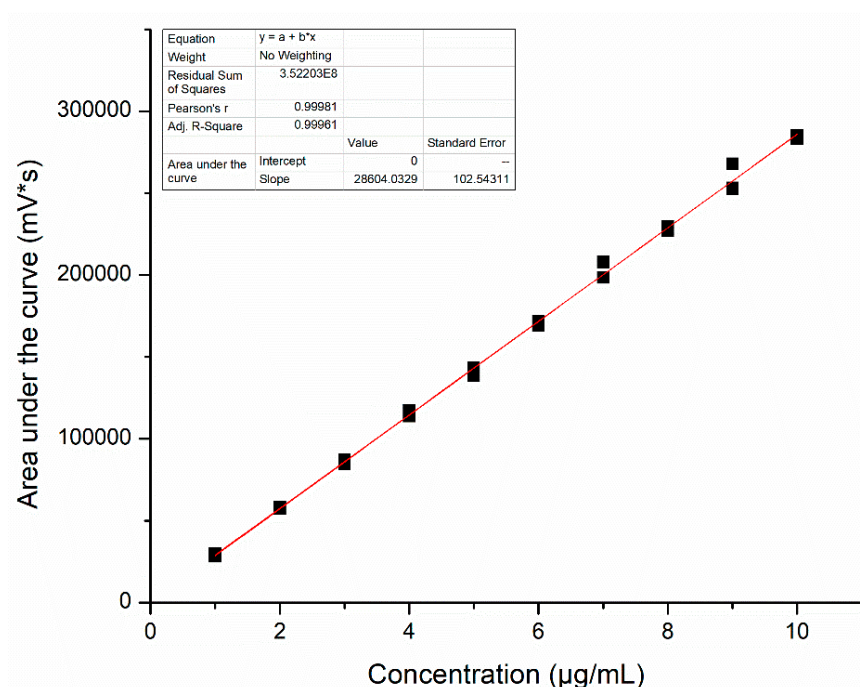

**Figure S1.** HPLC validation curve of epalrestat detection using the experimental conditions described in the HPLC section of the materials and methods.

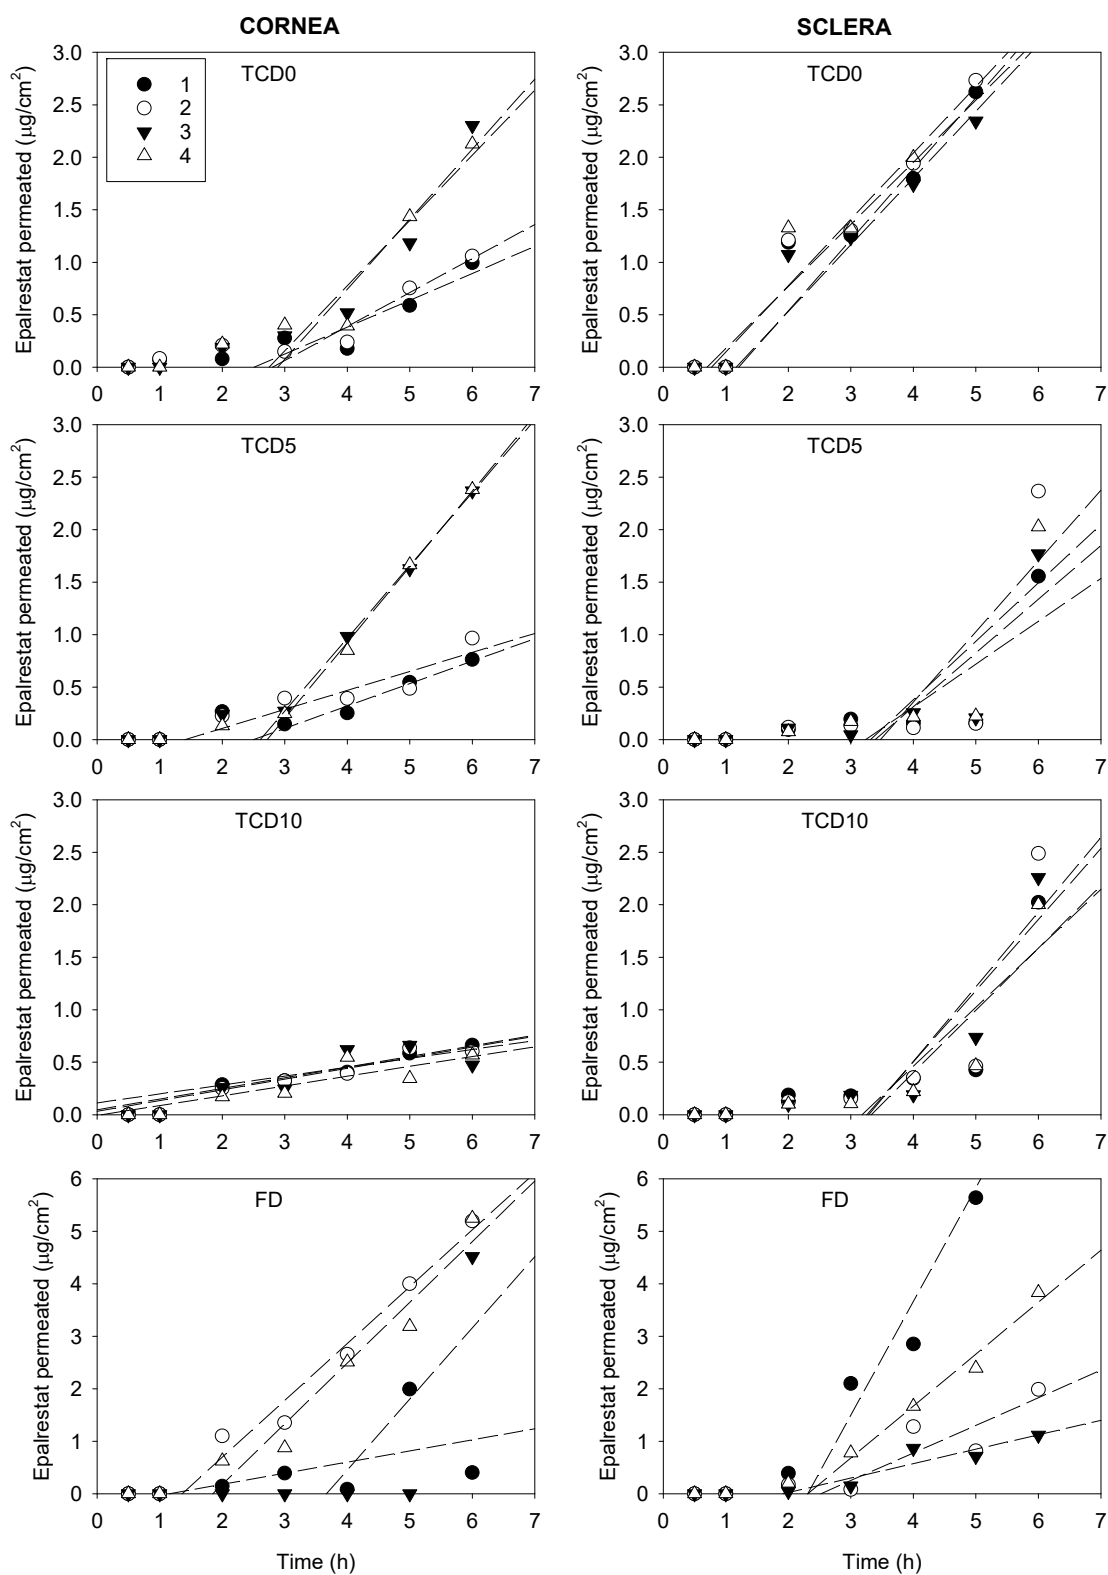

**Figure S2.** Epalrestat permeability data through cornea and sclera recorded for four independent replicates of each niosome formulation (TCD0, TCD5, TCD10) and control epalrestat solution (200  $\mu\text{g}/\text{mL}$ ).

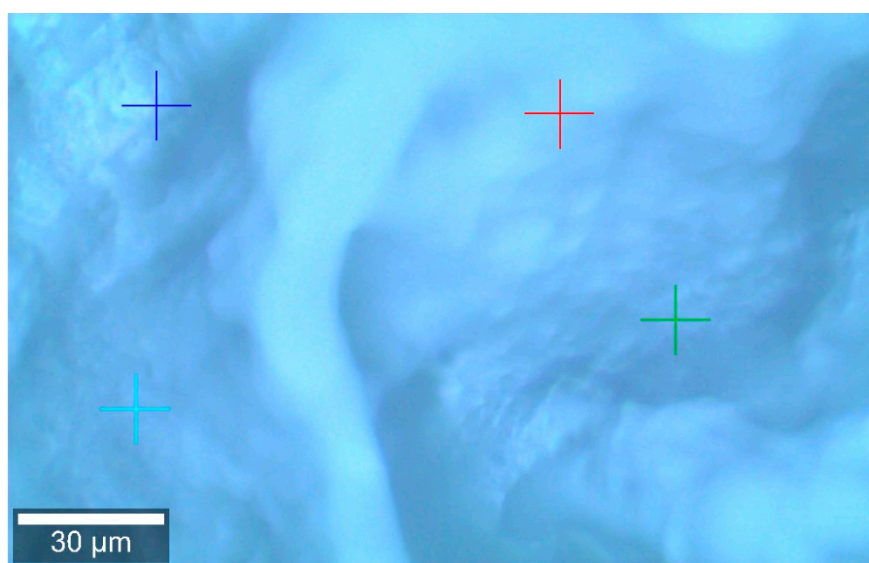

**Figure S3.** Image of the sample free drug cornea top under x50 magnification, with the crosses indicating the locations the Raman spectrum was taken.

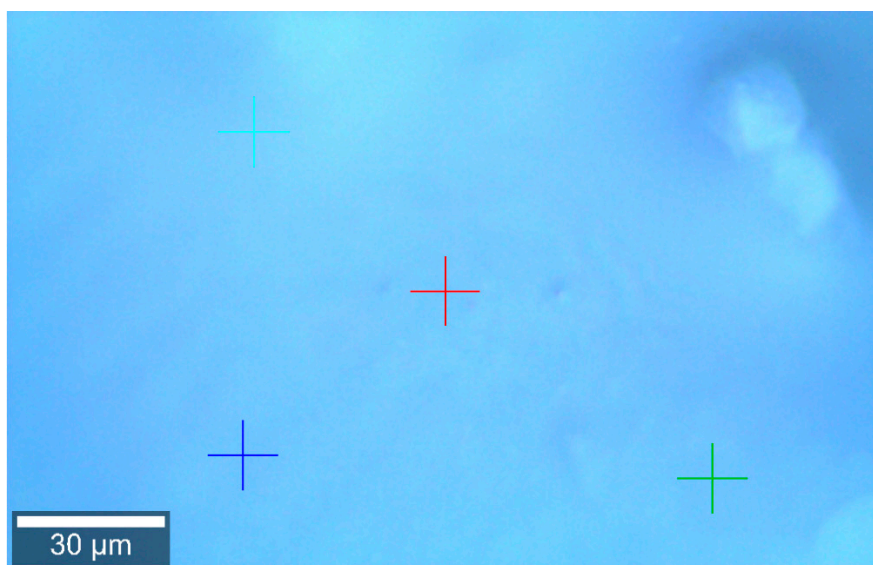

**Figure S4.** Image of the sample free drug cornea bottom under x50 magnification, with the crosses indicating the locations the Raman spectrum was taken.

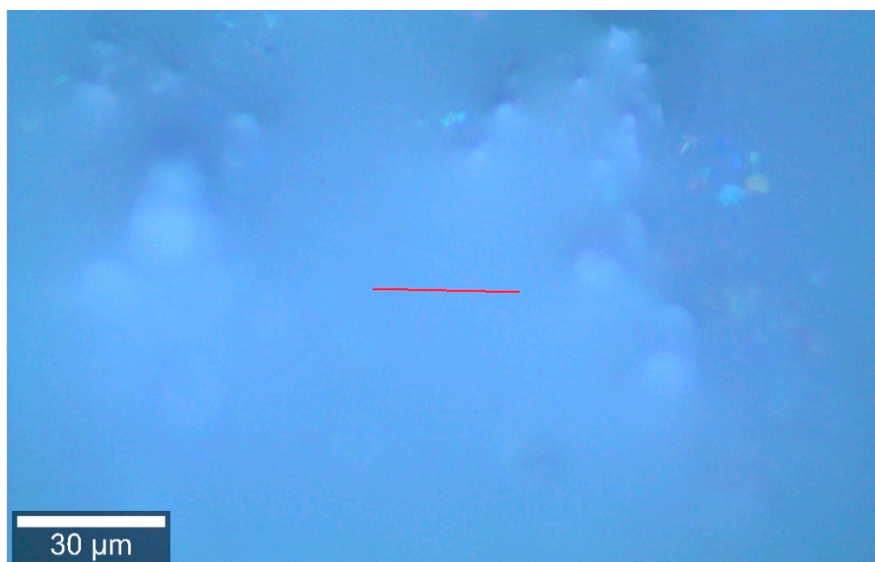

**Figure S5.** Image of the sample TCD0 cornea bottom under x50 magnification, with the line indicating the locations the Raman spectra were taken.

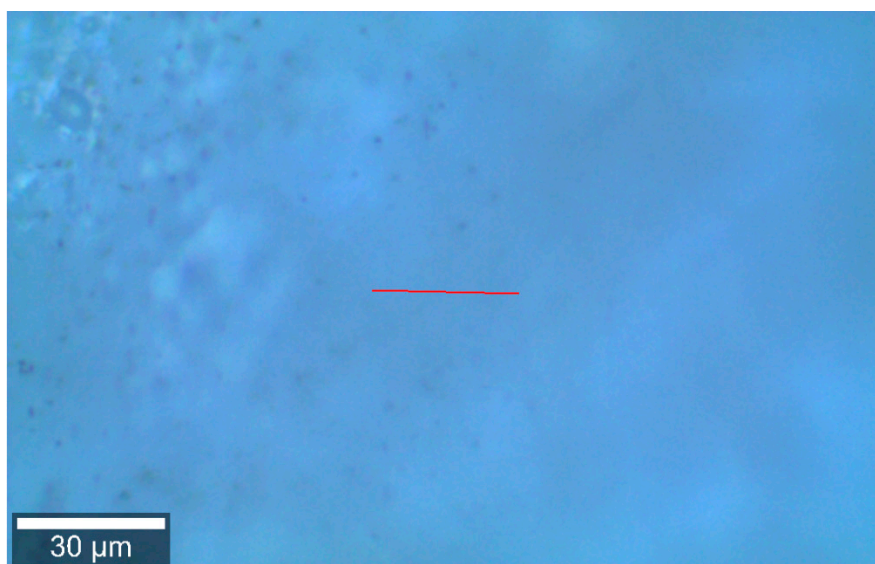

**Figure S6.** Image of the sample TCD5 cornea bottom under x50 magnification, with the line indicating the locations the Raman spectra were taken.

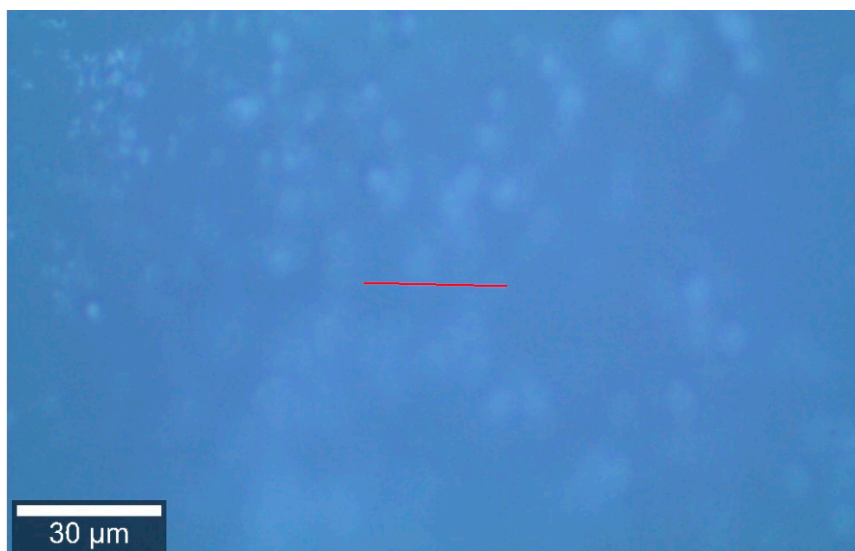

**Figure S7.** Image of the sample TCD10 sclera bottom under x50 magnification, with the line indicating the locations the Raman spectra were taken.

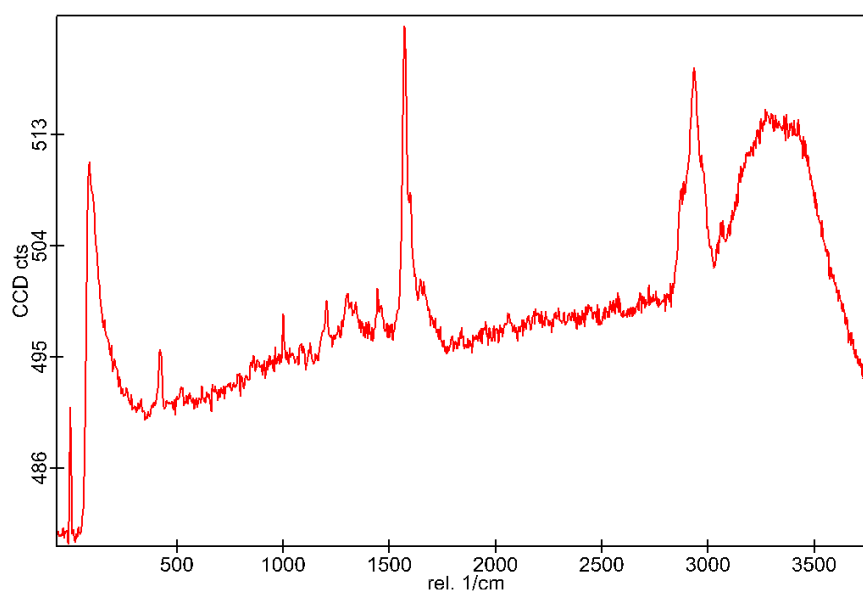

**Figure S8.** Raman spectrum of sample free drug cornea top at the blue cross in Figure A3.

**Table S1.** Viscosity values recorded at 35 °C for the epalrestat-loaded niosomes under increasing shear stress conditions.

| TCD0              |                               |                  | TCD5              |                               |                  | TCD10             |                               |                  |
|-------------------|-------------------------------|------------------|-------------------|-------------------------------|------------------|-------------------|-------------------------------|------------------|
| Shear stress (Pa) | Shear rate (s <sup>-1</sup> ) | Viscosity (Pa·s) | Shear stress (Pa) | Shear rate (s <sup>-1</sup> ) | Viscosity (Pa·s) | Shear stress (Pa) | Shear rate (s <sup>-1</sup> ) | Viscosity (Pa·s) |
| 0.05532           | 3.667                         | 0.01508          | 0.06584           | 3.641                         | 0.01808          | 0.04964           | 3.424                         | 0.0145           |
| 0.05856           | 7.664                         | 7.64E-03         | 0.08584           | 7.64                          | 0.01124          | 0.05635           | 7.422                         | 7.59E-03         |
| 0.06467           | 11.66                         | 5.54E-03         | 0.05987           | 11.64                         | 5.14E-03         | 0.0571            | 11.42                         | 5.00E-03         |
| 0.04693           | 15.67                         | 3.00E-03         | 0.04123           | 15.64                         | 2.64E-03         | 0.05781           | 15.42                         | 3.75E-03         |
| 0.07116           | 19.66                         | 3.62E-03         | 0.08314           | 19.64                         | 4.23E-03         | 0.06444           | 19.42                         | 3.32E-03         |
| 0.05301           | 23.66                         | 2.24E-03         | 0.05154           | 23.63                         | 2.18E-03         | 0.06574           | 23.42                         | 2.81E-03         |
| 0.07594           | 27.66                         | 2.75E-03         | 0.0685            | 27.64                         | 2.48E-03         | 0.07211           | 27.42                         | 2.63E-03         |
| 0.08408           | 31.66                         | 2.66E-03         | 0.09397           | 31.64                         | 2.97E-03         | 0.07641           | 31.42                         | 2.43E-03         |
| 0.08446           | 35.66                         | 2.37E-03         | 0.09725           | 35.63                         | 2.73E-03         | 0.07975           | 35.42                         | 2.25E-03         |
| 0.08825           | 39.66                         | 2.23E-03         | 0.1009            | 39.63                         | 2.55E-03         | 0.0842            | 39.42                         | 2.14E-03         |
| 0.0951            | 43.66                         | 2.18E-03         | 0.1059            | 43.63                         | 2.43E-03         | 0.0878            | 43.41                         | 2.02E-03         |
| 0.09892           | 47.66                         | 2.08E-03         | 0.09583           | 47.64                         | 2.01E-03         | 0.09117           | 47.41                         | 1.92E-03         |
| 0.08522           | 51.66                         | 1.65E-03         | 0.07739           | 51.63                         | 1.50E-03         | 0.0941            | 51.41                         | 1.83E-03         |
| 0.1034            | 55.65                         | 1.86E-03         | 0.1159            | 55.62                         | 2.08E-03         | 0.1007            | 55.41                         | 1.82E-03         |
| 0.09611           | 59.66                         | 1.61E-03         | 0.08602           | 59.63                         | 1.44E-03         | 0.1021            | 59.41                         | 1.72E-03         |
| 0.1154            | 63.65                         | 1.81E-03         | 0.1254            | 63.63                         | 1.97E-03         | 0.1083            | 63.41                         | 1.71E-03         |
| 0.1069            | 67.65                         | 1.58E-03         | 0.1148            | 67.62                         | 1.70E-03         | 0.111             | 67.41                         | 1.65E-03         |
| 0.1015            | 71.65                         | 1.42E-03         | 0.09972           | 71.62                         | 1.39E-03         | 0.1137            | 71.41                         | 1.59E-03         |
| 0.1076            | 75.65                         | 1.42E-03         | 0.1007            | 75.62                         | 1.33E-03         | 0.1173            | 75.4                          | 1.56E-03         |
| 0.1092            | 79.65                         | 1.37E-03         | 0.105             | 79.62                         | 1.32E-03         | 0.1214            | 79.41                         | 1.53E-03         |
| 0.1174            | 83.65                         | 1.40E-03         | 0.1225            | 83.62                         | 1.47E-03         | 0.1258            | 83.4                          | 1.51E-03         |
| 0.1359            | 87.64                         | 1.55E-03         | 0.149             | 87.62                         | 1.70E-03         | 0.1342            | 87.4                          | 1.54E-03         |
| 0.1323            | 91.65                         | 1.44E-03         | 0.1274            | 91.63                         | 1.39E-03         | 0.1348            | 91.4                          | 1.48E-03         |
| 0.1328            | 95.64                         | 1.39E-03         | 0.1418            | 95.61                         | 1.48E-03         | 0.1387            | 95.4                          | 1.45E-03         |
| 0.1377            | 99.65                         | 1.38E-03         | 0.1318            | 99.63                         | 1.32E-03         | 0.1423            | 99.41                         | 1.43E-03         |
| 0.1522            | 103.6                         | 1.47E-03         | 0.1651            | 103.6                         | 1.59E-03         | 0.1513            | 103.4                         | 1.46E-03         |
| 0.1454            | 107.6                         | 1.35E-03         | 0.1533            | 107.6                         | 1.43E-03         | 0.1505            | 107.4                         | 1.40E-03         |
| 0.1419            | 111.6                         | 1.27E-03         | 0.1424            | 111.6                         | 1.28E-03         | 0.1523            | 111.4                         | 1.37E-03         |
| 0.1448            | 115.6                         | 1.25E-03         | 0.144             | 115.6                         | 1.25E-03         | 0.1554            | 115.4                         | 1.35E-03         |
| 0.1531            | 119.6                         | 1.28E-03         | 0.1575            | 119.6                         | 1.32E-03         | 0.1603            | 119.4                         | 1.34E-03         |
| 0.1687            | 123.6                         | 1.36E-03         | 0.1819            | 123.6                         | 1.47E-03         | 0.1711            | 123.4                         | 1.39E-03         |
| 0.1713            | 127.6                         | 1.34E-03         | 0.1753            | 127.6                         | 1.37E-03         | 0.1756            | 127.4                         | 1.38E-03         |
| 0.1597            | 131.6                         | 1.21E-03         | 0.1567            | 131.6                         | 1.19E-03         | 0.1715            | 131.4                         | 1.31E-03         |
| 0.1823            | 135.6                         | 1.34E-03         | 0.1924            | 135.6                         | 1.42E-03         | 0.1862            | 135.4                         | 1.38E-03         |
| 0.1725            | 139.6                         | 1.24E-03         | 0.1766            | 139.6                         | 1.27E-03         | 0.1796            | 139.4                         | 1.29E-03         |
| 0.1708            | 143.6                         | 1.19E-03         | 0.1654            | 143.6                         | 1.15E-03         | 0.1869            | 143.4                         | 1.30E-03         |
| 0.1849            | 147.6                         | 1.25E-03         | 0.1875            | 147.6                         | 1.27E-03         | 0.1972            | 147.4                         | 1.34E-03         |
| 0.1938            | 151.6                         | 1.28E-03         | 0.2019            | 151.6                         | 1.33E-03         | 0.2048            | 151.4                         | 1.35E-03         |
| 0.1956            | 155.6                         | 1.26E-03         | 0.2028            | 155.6                         | 1.30E-03         | 0.2084            | 155.4                         | 1.34E-03         |
| 0.1898            | 159.6                         | 1.19E-03         | 0.1882            | 159.6                         | 1.18E-03         | 0.2087            | 159.4                         | 1.31E-03         |
| 0.1885            | 163.6                         | 1.15E-03         | 0.1863            | 163.6                         | 1.14E-03         | 0.2041            | 163.4                         | 1.25E-03         |
| 0.213             | 167.6                         | 1.27E-03         | 0.2286            | 167.6                         | 1.36E-03         | 0.2169            | 167.4                         | 1.30E-03         |
| 0.1975            | 171.6                         | 1.15E-03         | 0.1967            | 171.6                         | 1.15E-03         | 0.2212            | 171.4                         | 1.29E-03         |
| 0.2211            | 175.6                         | 1.26E-03         | 0.236             | 175.6                         | 1.34E-03         | 0.2264            | 175.4                         | 1.29E-03         |
| 0.2039            | 179.6                         | 1.14E-03         | 0.2024            | 179.6                         | 1.13E-03         | 0.2218            | 179.4                         | 1.24E-03         |
| 0.2104            | 183.6                         | 1.15E-03         | 0.2114            | 183.6                         | 1.15E-03         | 0.2377            | 183.4                         | 1.30E-03         |

|        |       |          |        |       |          |        |       |          |
|--------|-------|----------|--------|-------|----------|--------|-------|----------|
| 0.2224 | 187.6 | 1.19E-03 | 0.2323 | 187.6 | 1.24E-03 | 0.2469 | 187.4 | 1.32E-03 |
| 0.2282 | 191.6 | 1.19E-03 | 0.2401 | 191.6 | 1.25E-03 | 0.2525 | 191.4 | 1.32E-03 |
| 0.2254 | 195.6 | 1.15E-03 | 0.2319 | 195.6 | 1.19E-03 | 0.2566 | 195.4 | 1.31E-03 |
| 0.2449 | 199.2 | 1.23E-03 | 0.2616 | 199.2 | 1.31E-03 | 0.25   | 199   | 1.26E-03 |
